# Supplementary material
Source: HighWire-hosted journal article supplement (https://ebm.bmj.com/content/23/1/29)
Supplement: inline-supplementary-material-2 [file inline-supplementary-material-2.pdf]

# Mapping the Informed Health Choices (IHC) Key Concepts to the Department of Education National Science Curriculum in England.

| IHC Key Concepts (KC) |                                   |                                                                                                         | National Curriculum in England                 |                                                                                                                                                               |
|-----------------------|-----------------------------------|---------------------------------------------------------------------------------------------------------|------------------------------------------------|---------------------------------------------------------------------------------------------------------------------------------------------------------------|
| KC Number             | KC Short Title                    | KC Statement                                                                                            | Key Stage 3 Section                            | Key Stage 3 Statement                                                                                                                                         |
| 1.01                  | Treatments can harm               | Treatments may be harmful                                                                               | Working Scientifically<br>Scientific Attitudes | Evaluate risks                                                                                                                                                |
| 1.02                  | Anecdotes are unreliable evidence | Personal experiences or anecdotes are an unreliable basis for assessing the effects of most treatments. | Overview                                       | Understand that science is about working objectively, modifying explanations to take account of new evidence and ideas and subjecting results to peer review. |
| 1.02                  | Anecdotes are unreliable evidence | Personal experiences or anecdotes are an unreliable basis for assessing the effects of most treatments. | Working Scientifically<br>Scientific Attitudes | Pay attention to objectivity and concern for accuracy, precision, repeatability and reproducibility                                                           |

## Mapping the Informed Health Choices (IHC) Key Concepts to the Department of Education National Science Curriculum in England.

|      |                                              |                                                                                                                 |                                                                |                                                                                                                                                                                 |
|------|----------------------------------------------|-----------------------------------------------------------------------------------------------------------------|----------------------------------------------------------------|---------------------------------------------------------------------------------------------------------------------------------------------------------------------------------|
| 1.02 | Anecdotes are unreliable evidence            | Personal experiences or anecdotes are an unreliable basis for assessing the effects of most treatments.         | Working Scientifically<br>Experimental Skills & Investigations | Ask questions and develop a line of enquiry based on observations of the real world, alongside prior knowledge and experience.                                                  |
| 1.03 | Association is not the same as causation     | An 'outcome' may be associated with a treatment, but not caused by the treatment.                               | Working Scientifically<br>Experimental Skills & Investigations | Ask questions and develop a line of enquiry based on observations of the real world, alongside prior knowledge and experience.                                                  |
| 1.03 | Association is not the same as causation     | An 'outcome' may be associated with a treatment, but not caused by the treatment.                               | Working Scientifically<br>Experimental Skills & Investigations | Make and record observations and measurements using a range of methods for different investigations; and evaluate the reliability of methods and suggest possible improvements. |
| 1.03 | Association is not the same as causation     | An 'outcome' may be associated with a treatment, but not caused by the treatment.                               | Working Scientifically<br>Analysis & evaluation                | Evaluate data, showing awareness of potential sources of random and systematic error.                                                                                           |
| 1.04 | Common practice is not always evidence-based | Widely used treatments or treatments that have been used for a long time are not necessarily beneficial or safe | Overview                                                       | Understand that science is about working objectively, modifying explanations to take account of new evidence and ideas and subjecting results to peer review.                   |

## Mapping the Informed Health Choices (IHC) Key Concepts to the Department of Education National Science Curriculum in England.

|      |                                              |                                                                                                                 |                                                                |                                                                                                                                                                                                            |
|------|----------------------------------------------|-----------------------------------------------------------------------------------------------------------------|----------------------------------------------------------------|------------------------------------------------------------------------------------------------------------------------------------------------------------------------------------------------------------|
| 1.04 | Common practice is not always evidence-based | Widely used treatments or treatments that have been used for a long time are not necessarily beneficial or safe | Overview                                                       | Teachers should feel free to choose examples that serve a variety of purposes, from showing how scientific ideas have developed historically to reflecting modern developments in science.                 |
| 1.04 | Common practice is not always evidence-based | Widely used treatments or treatments that have been used for a long time are not necessarily beneficial or safe | Working Scientifically<br>Scientific Attitudes                 | Understand that scientific methods and theories develop as earlier explanations are modified to take account of new evidence and ideas, together with the importance of publishing results and peer review |
| 1.04 | Common practice is not always evidence-based | Widely used treatments or treatments that have been used for a long time are not necessarily beneficial or safe | Working Scientifically<br>Experimental Skills & Investigations | Ask questions and develop a line of enquiry based on observations of the real world, alongside prior knowledge and experience.                                                                             |
| 1.05 | Newer is not necessarily better              | New, brand-named, or more expensive treatments may not be better than available alternatives                    | Overview                                                       | Understand that science is about working objectively, modifying explanations to take account of new evidence and ideas and subjecting results to peer review.                                              |
| 1.05 | Newer is not necessarily better              | New, brand-named, or more expensive treatments may not be better than available alternatives                    | Working Scientifically<br>Scientific Attitudes                 | Understand that scientific methods and theories develop as earlier explanations are modified to take account of new evidence and ideas, together with the importance of publishing results and peer review |

## Mapping the Informed Health Choices (IHC) Key Concepts to the Department of Education National Science Curriculum in England.

|      |                                    |                                                                                                                               |                                                                |                                                                                                                                                               |
|------|------------------------------------|-------------------------------------------------------------------------------------------------------------------------------|----------------------------------------------------------------|---------------------------------------------------------------------------------------------------------------------------------------------------------------|
| 1.06 | Expert opinion is not always right | Opinions of experts or authorities do not alone provide a reliable basis for deciding on the benefits and harms of treatments | Overview                                                       | Understand that science is about working objectively, modifying explanations to take account of new evidence and ideas and subjecting results to peer review. |
| 1.06 | Expert opinion is not always right | Opinions of experts or authorities do not alone provide a reliable basis for deciding on the benefits and harms of treatments | Working Scientifically<br>Scientific Attitudes                 | Pay attention to objectivity and concern for accuracy, precision, repeatability and reproducibility                                                           |
| 1.06 | Expert opinion is not always right | Opinions of experts or authorities do not alone provide a reliable basis for deciding on the benefits and harms of treatments | Working Scientifically<br>Scientific Attitudes                 | Evaluate risks                                                                                                                                                |
| 1.06 | Expert opinion is not always right | Opinions of experts or authorities do not alone provide a reliable basis for deciding on the benefits and harms of treatments | Working Scientifically<br>Experimental Skills & Investigations | Ask questions and develop a line of enquiry based on observations of the real world, alongside prior knowledge and experience.                                |
| 1.07 | Beware of conflicting interests    | Conflicting interests may result in misleading claims about the effects of treatments.                                        | Overview                                                       | Understand that science is about working objectively, modifying explanations to take account of new evidence and ideas and subjecting results to peer review. |

## Mapping the Informed Health Choices (IHC) Key Concepts to the Department of Education National Science Curriculum in England.

|      |                                 |                                                                                                                    |                                                 |                                                                                                                                                                                                            |
|------|---------------------------------|--------------------------------------------------------------------------------------------------------------------|-------------------------------------------------|------------------------------------------------------------------------------------------------------------------------------------------------------------------------------------------------------------|
| 1.07 | Beware of conflicting interests | Conflicting interests may result in misleading claims about the effects of treatments.                             | Working Scientifically<br>Scientific Attitudes  | Pay attention to objectivity and concern for accuracy, precision, repeatability and reproducibility                                                                                                        |
| 1.07 | Beware of conflicting interests | Conflicting interests may result in misleading claims about the effects of treatments.                             | Working Scientifically<br>Analysis & evaluation | Evaluate data, showing awareness of potential sources of random and systematic error.                                                                                                                      |
| 1.08 | More is not necessarily better  | Increasing the amount of a treatment does not necessarily increase the benefits of a treatment and may cause harm. | Overview                                        | Understand that science is about working objectively, modifying explanations to take account of new evidence and ideas and subjecting results to peer review.                                              |
| 1.08 | More is not necessarily better  | Increasing the amount of a treatment does not necessarily increase the benefits of a treatment and may cause harm. | Overview                                        | Teachers should feel free to choose examples that serve a variety of purposes, from showing how scientific ideas have developed historically to reflecting modern developments in science.                 |
| 1.08 | More is not necessarily better  | Increasing the amount of a treatment does not necessarily increase the benefits of a treatment and may cause harm. | Working Scientifically<br>Scientific Attitudes  | Understand that scientific methods and theories develop as earlier explanations are modified to take account of new evidence and ideas, together with the importance of publishing results and peer review |

## Mapping the Informed Health Choices (IHC) Key Concepts to the Department of Education National Science Curriculum in England.

|      |                                                     |                                                                                                                    |                                                                |                                                                                                                                                                                                            |
|------|-----------------------------------------------------|--------------------------------------------------------------------------------------------------------------------|----------------------------------------------------------------|------------------------------------------------------------------------------------------------------------------------------------------------------------------------------------------------------------|
| 1.08 | More is not necessarily better                      | Increasing the amount of a treatment does not necessarily increase the benefits of a treatment and may cause harm. | Working Scientifically<br>Experimental Skills & Investigations | Ask questions and develop a line of enquiry based on observations of the real world, alongside prior knowledge and experience.                                                                             |
| 1.09 | Earlier is not necessarily better                   | Earlier detection of disease is not necessarily better.                                                            |                                                                |                                                                                                                                                                                                            |
| 1.10 | Hope may lead to unrealistic expectations           | Hope or fear can lead to unrealistic expectations about the effects of treatments.                                 |                                                                |                                                                                                                                                                                                            |
| 1.11 | Explanations about how treatments work can be wrong | Beliefs about how treatments work are not reliable predictors of the actual effects of treatments                  | Working Scientifically<br>Scientific Attitudes                 | Understand that scientific methods and theories develop as earlier explanations are modified to take account of new evidence and ideas, together with the importance of publishing results and peer review |
| 1.11 | Explanations about how treatments work can be wrong | Beliefs about how treatments work are not reliable predictors of the actual effects of treatments.                 | Working Scientifically<br>Experimental Skills & Investigations | Ask questions and develop a line of enquiry based on observations of the real world, alongside prior knowledge and experience.                                                                             |

## Mapping the Informed Health Choices (IHC) Key Concepts to the Department of Education National Science Curriculum in England.

|      |                                                                       |                                                                                                    |                                                                |                                                                                                                                                                        |
|------|-----------------------------------------------------------------------|----------------------------------------------------------------------------------------------------|----------------------------------------------------------------|------------------------------------------------------------------------------------------------------------------------------------------------------------------------|
| 1.11 | Explanations about how treatments work can be wrong                   | Beliefs about how treatments work are not reliable predictors of the actual effects of treatments. | Working Scientifically<br>Analysis & evaluation                | Present reasoned explanations, including explaining data in relation to predictions and hypotheses.                                                                    |
| 1.12 | Dramatic treatment effects are rare                                   | Large, dramatic effects of treatments are rare.                                                    | Working Scientifically<br>Experimental Skills & Investigations | Ask questions and develop a line of enquiry based on observations of the real world, alongside prior knowledge and experience.                                         |
| 1.12 | Dramatic treatment effects are rare                                   | Large, dramatic effects of treatments are rare.                                                    |                                                                |                                                                                                                                                                        |
| 2.01 | Evaluating the effects of treatments requires appropriate comparisons | Evaluating the effects of treatments requires appropriate comparisons.                             | Working Scientifically<br>Experimental Skills & Investigations | Select, plan and carry out the most appropriate types of scientific enquiries to test predictions, including identifying independent, dependent and control variables. |
| 2.01 | Evaluating the effects of treatments requires appropriate comparisons | Evaluating the effects of treatments requires appropriate comparisons.                             | Working Scientifically<br>Experimental Skills & Investigations | Apply sampling techniques.                                                                                                                                             |

## Mapping the Informed Health Choices (IHC) Key Concepts to the Department of Education National Science Curriculum in England.

|      |                                                                       |                                                                                                                                  |                                                                |                                                                                                                                                                        |
|------|-----------------------------------------------------------------------|----------------------------------------------------------------------------------------------------------------------------------|----------------------------------------------------------------|------------------------------------------------------------------------------------------------------------------------------------------------------------------------|
| 2.01 | Evaluating the effects of treatments requires appropriate comparisons | Evaluating the effects of treatments requires appropriate comparisons.                                                           | Working Scientifically<br>Analysis & evaluation                | Evaluate data, showing awareness of potential sources of random and systematic error.                                                                                  |
| 2.02 | Comparison groups should be similar                                   | Apart from the treatments being compared, the comparison groups need to be similar (i.e. 'like needs to be compared with like'). | Working Scientifically<br>Experimental Skills & Investigations | Select, plan and carry out the most appropriate types of scientific enquiries to test predictions, including identifying independent, dependent and control variables. |
| 2.02 | Comparison groups should be similar                                   | Apart from the treatments being compared, the comparison groups need to be similar (i.e. 'like needs to be compared with like'). | Working Scientifically<br>Analysis & evaluation                | Evaluate data, showing awareness of potential sources of random and systematic error.                                                                                  |
| 2.03 | Peoples' outcomes should be analysed in their original groups         | People's outcomes should be counted in the group to which they were allocated.                                                   | Working Scientifically<br>Analysis & evaluation                | Interpret observations and data, including identifying patterns and using observations, measurements and data to draw conclusions.                                     |
| 2.03 | Peoples' outcomes should be analysed in their original groups         | People's outcomes should be counted in the group to which they were allocated.                                                   | Working Scientifically<br>Analysis & evaluation                | Evaluate data, showing awareness of potential sources of random and systematic error.                                                                                  |



## Mapping the Informed Health Choices (IHC) Key Concepts to the Department of Education National Science Curriculum in England.

|      |                                                 |                                                                                                               |                                                                |                                                                                                                                                                        |
|------|-------------------------------------------------|---------------------------------------------------------------------------------------------------------------|----------------------------------------------------------------|------------------------------------------------------------------------------------------------------------------------------------------------------------------------|
| 2.04 | Comparison groups should be treated equally     | People in the groups being compared need to be cared for similarly (apart from the treatments being compared) | Working Scientifically<br>Experimental Skills & Investigations | Select, plan and carry out the most appropriate types of scientific enquiries to test predictions, including identifying independent, dependent and control variables. |
| 2.04 | Comparison groups should be treated equally     | People in the groups being compared need to be cared for similarly (apart from the treatments being compared) | Working Scientifically<br>Analysis & evaluation                | Evaluate data, showing awareness of potential sources of random and systematic error.                                                                                  |
| 2.05 | People should not know which treatment they get | If possible, people should not know which of the treatments being compared they are receiving.                | Working Scientifically<br>Experimental Skills & Investigations | Apply sampling techniques.                                                                                                                                             |
| 2.05 | People should not know which treatment they get | If possible, people should not know which of the treatments being compared they are receiving.                | Working Scientifically<br>Analysis & evaluation                | Evaluate data, showing awareness of potential sources of random and systematic error.                                                                                  |
| 2.06 | Peoples' outcomes should be assessed similarly  | Outcomes should be measured in the same way (fairly) in the treatment groups being compared.                  | Working Scientifically<br>Analysis & evaluation                | Interpret observations and data, including identifying patterns and using observations, measurements and data to draw conclusions.                                     |

## Mapping the Informed Health Choices (IHC) Key Concepts to the Department of Education National Science Curriculum in England.

|      |                                                |                                                                                              |                                                 |                                                                                                                                                                                                            |
|------|------------------------------------------------|----------------------------------------------------------------------------------------------|-------------------------------------------------|------------------------------------------------------------------------------------------------------------------------------------------------------------------------------------------------------------|
| 2.06 | Peoples' outcomes should be assessed similarly | Outcomes should be measured in the same way (fairly) in the treatment groups being compared. | Working Scientifically<br>Analysis & evaluation | Evaluate data, showing awareness of potential sources of random and systematic error.                                                                                                                      |
| 2.07 | All should be followed up                      | It is important to measure outcomes in everyone who was included in the treatment groups     | Working Scientifically<br>Analysis & evaluation | Interpret observations and data, including identifying patterns and using observations, measurements and data to draw conclusions.                                                                         |
| 2.07 | All should be followed up                      | It is important to measure outcomes in everyone who was included in the treatment groups     | Working Scientifically<br>Analysis & evaluation | Evaluate data, showing awareness of potential sources of random and systematic error.                                                                                                                      |
| 2.08 | Consider all of the relevant fair comparisons  | The results of single comparisons of treatments can be misleading                            | Working Scientifically<br>Scientific Attitudes  | Pay attention to objectivity and concern for accuracy, precision, repeatability and reproducibility                                                                                                        |
| 2.08 | Consider all of the relevant fair comparisons  | The results of single comparisons of treatments can be misleading                            | Working Scientifically<br>Scientific Attitudes  | Understand that scientific methods and theories develop as earlier explanations are modified to take account of new evidence and ideas, together with the importance of publishing results and peer review |

## Mapping the Informed Health Choices (IHC) Key Concepts to the Department of Education National Science Curriculum in England.

|      |                                                      |                                                                                             |                                                 |                                                                                                                                    |
|------|------------------------------------------------------|---------------------------------------------------------------------------------------------|-------------------------------------------------|------------------------------------------------------------------------------------------------------------------------------------|
| 2.08 | Consider all of the relevant fair comparisons        | The results of single comparisons of treatments can be misleading                           | Working Scientifically<br>Analysis & evaluation | Interpret observations and data, including identifying patterns and using observations, measurements and data to draw conclusions. |
| 2.08 | Consider all of the relevant fair comparisons        | The results of single comparisons of treatments can be misleading                           | Working Scientifically<br>Analysis & evaluation | Evaluate data, showing awareness of potential sources of random and systematic error.                                              |
| 2.09 | Reviews of fair comparisons should be systematic     | Reviews of treatment comparisons that do not use systematic methods can be misleading       | Working Scientifically<br>Analysis & evaluation | Evaluate data, showing awareness of potential sources of random and systematic error.                                              |
| 2.10 | All fair comparisons and outcomes should be reported | Unpublished results of fair comparisons may result in biased estimates of treatment effects | Working Scientifically<br>Analysis & evaluation | Evaluate data, showing awareness of potential sources of random and systematic error.                                              |
| 2.10 | All fair comparisons and outcomes should be reported | Unpublished results of fair comparisons may result in biased estimates of treatment effects | Working Scientifically<br>Analysis & evaluation | Evaluate data, showing awareness of potential sources of random and systematic error.                                              |

## Mapping the Informed Health Choices (IHC) Key Concepts to the Department of Education National Science Curriculum in England.

|      |                                                                      |                                                                                                                        |                                                 |                                                                                                     |
|------|----------------------------------------------------------------------|------------------------------------------------------------------------------------------------------------------------|-------------------------------------------------|-----------------------------------------------------------------------------------------------------|
| 2.11 | Subgroup analyses may be misleading                                  | Results for a selected group of people within a systematic review of fair comparisons of treatments can be misleading. | Working Scientifically<br>Analysis & evaluation | Evaluate data, showing awareness of potential sources of random and systematic error.               |
| 2.12 | Relative measures of effects can be misleading                       | Relative effects of treatments alone can be misleading                                                                 | Working Scientifically<br>Analysis & evaluation | Evaluate data, showing awareness of potential sources of random and systematic error.               |
| 2.13 | Average measures of effects can be misleading                        | Average differences between treatments can be misleading                                                               | Working Scientifically<br>Analysis & evaluation | Evaluate data, showing awareness of potential sources of random and systematic error.               |
| 2.14 | Fair comparisons with few people or outcome events can be misleading | Small studies in which few outcome events occur are usually not informative and the results may be misleading          | Working Scientifically<br>Scientific Attitudes  | Pay attention to objectivity and concern for accuracy, precision, repeatability and reproducibility |
| 2.14 | Fair comparisons with few people or outcome events can be misleading | Small studies in which few outcome events occur are usually not informative and the results may be misleading          | Working Scientifically<br>Analysis & evaluation | Evaluate data, showing awareness of potential sources of random and systematic error.               |

## Mapping the Informed Health Choices (IHC) Key Concepts to the Department of Education National Science Curriculum in England.

|      |                                                            |                                                                                                                                                     |                                                 |                                                                                                                                                                                                            |
|------|------------------------------------------------------------|-----------------------------------------------------------------------------------------------------------------------------------------------------|-------------------------------------------------|------------------------------------------------------------------------------------------------------------------------------------------------------------------------------------------------------------|
| 2.15 | Confidence intervals should be reported                    | The use of p-values to indicate the probability of something having occurred by chance may be misleading; confidence intervals are more informative |                                                 |                                                                                                                                                                                                            |
| 2.16 | Don't confuse "statistical significance" with "importance" | Saying that a difference is statistically significant or that it is not statistically significant can be misleading                                 |                                                 |                                                                                                                                                                                                            |
| 2.17 | Don't confuse "no evidence" with "no effect"               | A lack of evidence is not the same as evidence of "no difference"                                                                                   | Working Scientifically<br>Scientific Attitudes  | Understand that scientific methods and theories develop as earlier explanations are modified to take account of new evidence and ideas, together with the importance of publishing results and peer review |
| 2.17 | Don't confuse "no evidence" with "no effect"               | A lack of evidence is not the same as evidence of "no difference"                                                                                   | Working Scientifically<br>Analysis & evaluation | Interpret observations and data, including identifying patterns and using observations, measurements and data to draw conclusions.                                                                         |
| 3.01 | Do the outcomes measured matter to you?                    | A systematic review of fair comparisons of treatments should measure outcomes that are important                                                    |                                                 |                                                                                                                                                                                                            |

## Mapping the Informed Health Choices (IHC) Key Concepts to the Department of Education National Science Curriculum in England.

|      |                                                 |                                                                                                                                                                   |                                                 |                                                                                                                                    |
|------|-------------------------------------------------|-------------------------------------------------------------------------------------------------------------------------------------------------------------------|-------------------------------------------------|------------------------------------------------------------------------------------------------------------------------------------|
| 3.02 | Are you very different from the people studied? | A systematic review of fair comparisons of treatments in animals or highly selected groups of people may not be relevant                                          | Working Scientifically<br>Analysis & evaluation | Interpret observations and data, including identifying patterns and using observations, measurements and data to draw conclusions. |
| 3.03 | Are the treatments practical in your setting?   | The treatments evaluated in fair comparisons may not be relevant or applicable                                                                                    |                                                 |                                                                                                                                    |
| 3.04 | How certain is the evidence?                    | Well-done systematic reviews often reveal a lack of relevant evidence, but they provide the best basis for making judgements about the certainty of the evidence. | Working Scientifically<br>Scientific Attitudes  | Pay attention to objectivity and concern for accuracy, precision, repeatability and reproducibility                                |
| 3.04 | How certain is the evidence?                    | Well-done systematic reviews often reveal a lack of relevant evidence, but they provide the best basis for making judgements about the certainty of the evidence. | Working Scientifically<br>Analysis & evaluation | Evaluate data, showing awareness of potential sources of random and systematic error.                                              |
| 3.05 | Do the advantages outweigh the disadvantages?   | Decisions about treatments should not be based on considering only their benefits                                                                                 |                                                 |                                                                                                                                    |
